# Supplementary material for: PureCN: copy number calling and SNV classification using targeted short read sequencing
Source: PubMed Central journal article supplement (PMC5157099; doi:10.1186/s13029-016-0060-z), 2016-12-15

Simulated Annealing Iterations

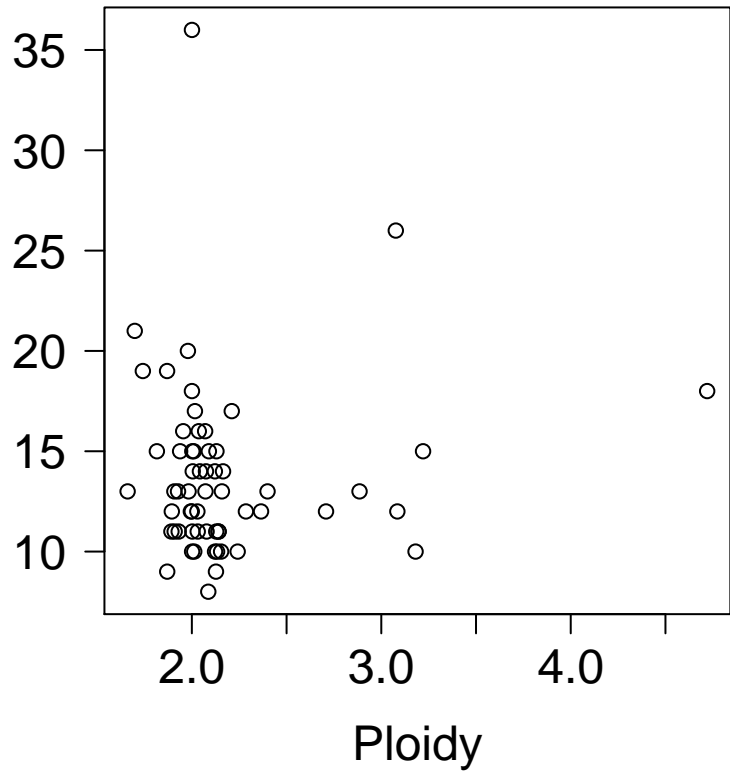

Simulated Annealing Iterations

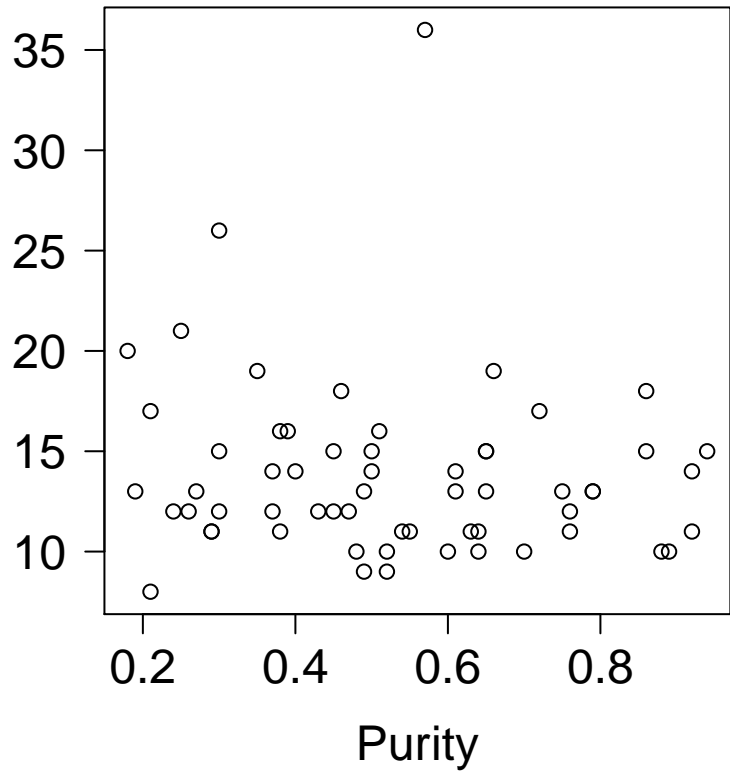

Supplement: 13029_2016_60_MOESM2_ESM.pdf [file 13029_2016_60_MOESM2_ESM.pdf]
